# Supplementary material for: The Drosophila L1CAM homolog Neuroglian signals through distinct pathways to control different aspects of mushroom body axon development
Source: Oxford University Press journal article supplement (doi:10.1242/dev.052787), 2011-03-10
Supplement: dev052787tables1.pdf [file dev052787tables1.pdf]

**Table S1. List of primers used in this study**

| Primers used for PCR amplification of <i>Nrg</i> exons                                            |                                                                                                                                                                                                                                             |
|---------------------------------------------------------------------------------------------------|---------------------------------------------------------------------------------------------------------------------------------------------------------------------------------------------------------------------------------------------|
| Exon 2 en 3                                                                                       | 5'-CGGCTCGCATGCAATTTTCATTAGTG<br>5'-TGCTCTTCTCTCGTGCCTTTGCT                                                                                                                                                                                 |
| Exon 4                                                                                            | 5'-TGGTATTCATTATCGACTGACACCC<br>5'-CCACATTGACGGCATCCTTGAGC                                                                                                                                                                                  |
| Exon 5, 6 and 7                                                                                   | 5'-CTGCCACCACGAAAATGGGCGAG<br>5'-CTGGAGGACACACTCGTATGATAC                                                                                                                                                                                   |
| Exon 8A                                                                                           | 5'-CTGCTGTCCACCAGTGGACTATC<br>5'-AATAACAAGCCTACTCTGGCATGCA                                                                                                                                                                                  |
| Exon 8B                                                                                           | 5'-CACAAATGCAATGGGGTTGTAATAGA<br>5'-AGCGTTTCTTCTCAAAGCGGCA                                                                                                                                                                                  |
| Primers used for sequencing of <i>Nrg</i> exons                                                   |                                                                                                                                                                                                                                             |
| Exon 2                                                                                            | 5'-ACGATTGAAGCCCAAGT                                                                                                                                                                                                                        |
| Exon 3                                                                                            | 5'-CATCGATCTTGCCATTC                                                                                                                                                                                                                        |
| Exon 4                                                                                            | 5'-AGATTGGCAACAAGGTG<br>5'-CTGGTTAAGGGCGATAC<br>5'-GATTGCCAAGACAATGG<br>5'-CATATTCGACTGGCGAC<br>5'-CAATGGACGCTTCAATG<br>5'-GTGTGACCAGAGCGTTG<br>5'-TCTTGAAGGGCACATCC<br>5'-CTCCACCAATCGATCT<br>5'-ATGGGCTTACCATTGTG<br>5'-CACGGGTAACATTCGAG |
| Exon 5                                                                                            | 5'-TCACTTGCTGTCAAGTCG                                                                                                                                                                                                                       |
| Exon 6                                                                                            | 5'-CGACTGACAGCAAGTGA<br>5'-CGATTTGCTATTACGAA                                                                                                                                                                                                |
| Exon 7                                                                                            | 5'-TTCGTAATAGCAAATCG                                                                                                                                                                                                                        |
| Exon 8A                                                                                           | 5'-AATATCGAAACCGAGCC                                                                                                                                                                                                                        |
| Exon 8B                                                                                           | 5'-GTTCAAGTTGTTGGCA<br>5'-TGGTAGAAAATCAGGAG                                                                                                                                                                                                 |
| Primers used for generating <i>pRmHa-3-Nrg-180</i> constructs (mutant nucleotides are underlined) |                                                                                                                                                                                                                                             |
| <i>Nrg-180</i> <sup>mut849</sup>                                                                  | 5'-GGAGCTGGCATT <u>CT</u> CACGGGTAAC<br>5'-GTTACCCGTGAG <u>A</u> ATGCCAGCTCC                                                                                                                                                                |
| <i>Nrg-180</i> <sup>mut892</sup>                                                                  | 5'-GAGGTGGCC <u>A</u> AGCAGGCATAGTAG<br>5'-CTACTATGCCTGCT <u>T</u> GGCCACCTC                                                                                                                                                                |
| PCR primers for generating ligand overlay constructs                                              |                                                                                                                                                                                                                                             |
| NRG-180 <sub>cyt</sub>                                                                            | 5'-ATCGGAATTC <del>CC</del> GCAATCGGGGCGGAAAGT<br>5'-ATTTCTCGAGTTAGACGTAGGTGGCCACGG                                                                                                                                                         |
| NRG-167 <sub>cyt</sub>                                                                            | 5'-ATCGGAATTC <del>CC</del> GCAATCGGGGCGGAAAGT<br>5'-CTTCCTCGAGTTAAAGTCCTTTGCGTCCATATTGG                                                                                                                                                    |
| NRG-180 <sub>cyt</sub> ΔTYV                                                                       | 5'-ATCGGAATTC <del>CC</del> GCAATCGGGGCGGAAAGT<br>5'-ATTTCTCGAGTTAGGCCACGGCTCCGGCT                                                                                                                                                          |
| PYD-PDZ1                                                                                          | 5'-CATAGGATCCTGAAGTTTCCGGATTATGTTCC<br>5'-CCTGGAATTATTAATGGGATTGAGGGGCACGCGACGC                                                                                                                                                             |
| PYD-PDZ2                                                                                          | 5'-CATAGGATCCTGCTCAGTTCGGTTGGTCTAATGGCC<br>5'-CCTGGAATTCACCTGGTGGCTGGCTGAATTGTTGAG                                                                                                                                                          |
| PYD-PDZ1-2                                                                                        | 5'-CATAGGATCCTGAACATGTTGGTGGGTGATCGAACC<br>5'-CCTGGAATTCACCTGGTGGCTGGCTGAATTGTTGAG                                                                                                                                                          |
| PYD-PDZ3                                                                                          | 5'-GCGCGGATCCCAGATTCAATTCCTCCAGAAGG<br>5'-GCGCGAATTCACCACCTCGTCGTATTCTCTCC                                                                                                                                                                  |
| PYD-PDZ1-2-3                                                                                      | 5'-CATAGGATCCTGAACATGTTGGTGGGTGATCGAACC<br>5'-GCGCGAATTCACCACCTCGTCGTATTCTCTCC                                                                                                                                                              |
